# Supplementary material
Source: HighWire-hosted journal article supplement (https://gut.bmj.com/content/68/12/2186)
Supplement: inline-supplementary-material-2 [file inline-supplementary-material-2.pdf]

## Supplemental Tables and Figures

**Supplemental Table 1. Clinical characteristics FFPE tissue patient subset**

| Parameters                                               | FFPE subset<br>(n = 25)   | non-IPMN <sup>§</sup><br>(n=9)                | IPMN<br>(n = 10)                 | Cancer<br>(n = 6)                               |
|----------------------------------------------------------|---------------------------|-----------------------------------------------|----------------------------------|-------------------------------------------------|
| Gender (F:M)                                             | 13:12                     | <b>8:1*†</b>                                  | <b>2:8*</b>                      | <b>2:4†</b>                                     |
| Age (years)<br>median (range)                            | 66<br>(31 – 81)           | <b>48*†</b><br><b>(31 – 68)</b>               | <b>66.5*</b><br><b>(47 – 78)</b> | <b>70.5†</b><br><b>(65 – 81)</b>                |
| BMI (kg/m <sup>2</sup> )<br>median (range)               | 25.8<br>(20.2 – 35.0)     | 28.0<br>(23.0 – 35)                           | 25.3<br>(21.5 – 30.6)            | 25.4<br>(20.2 – 29.4)                           |
| Smoking (%)                                              | 12                        | 22.2                                          | 10                               | 0                                               |
| Alcohol (%)                                              | 40                        | 44.4                                          | 40.0                             | 33.3                                            |
| Diabetes (%)                                             | 16                        | 0                                             | 20.0                             | 33.3                                            |
| PPI use (%)                                              | 12                        | 22                                            | 10.0                             | 0                                               |
| S-Ca 19-9 (kE/L)<br>median (range)<br>above normal # (%) | 8.8<br>(<1.0 – 480)<br>28 | <b>7.9†</b><br><b>(5.9 – 34)</b><br><b>0†</b> | 5.7<br>(<1.0 – 71)<br>10.0       | <b>315†</b><br><b>(63 – 480)</b><br><b>100†</b> |
| HbA1c (mmol/mol)<br>median (range)                       | 36<br>(30 – 64)           | 33.0<br>(30 – 43)                             | 38.5<br>(32 – 64)                | 37.5<br>(31 – 52)                               |
| Amylase (µkat/L)<br>median (range)                       | 0.30<br>(<0.13 – 2.62)    | 0.31<br>(0.22 – 1.64)                         | 0.25<br>(<0.13 – 2.62)           | <0.13<br>(<0.13 – 0.34)                         |
| Albumin (g/L)<br>median (range)                          | 36<br>(28 – 42)           | <b>38.0†</b><br><b>(33 – 42)</b>              | 36.0<br>(30 – 42)                | <b>28.5†</b><br><b>(28 – 36)</b>                |
| Bilirubin (µmol/L)<br>median (range)                     | 6<br>(<3 – 119)           | <b>5†</b><br><b>(&lt;3 – 18)</b>              | 6<br>(<3 – 17)                   | <b>14†</b><br><b>(5 – 119)</b>                  |
| CRP (mg/L)<br>median (range)                             | 2<br>(1 – 130)            | 2<br>(1 – 13)                                 | 1<br>(1 – 49)                    | 17<br>(2 – 130)                                 |
| Invasive endoscopic procedure (%)<br>mean freq. (range)  | 48<br>0.8 (0 – 3)         | <b>11.1†</b><br><b>0.11 (0 – 1) †</b>         | 50.0<br>1 (0 – 3)                | <b>100†</b><br><b>1.5 (1 – 3) †</b>             |
| Uni-/Multicystic (%)                                     | 68/32                     | 88.8/11.1                                     | 40/60                            | 83.3/16.6                                       |

<sup>§</sup> non-IPMN group comprises of MCN (n=3) and SCN (n=6)

# normal S-Ca 19-9 < 34 kE/L

Pairwise comparisons between the diagnosis groups were made using Fisher's exact test (qualitative parameters) and Kruskal-Wallis test with Dunn's multiple comparisons correction (quantitative variables).

\* indicates "non-IPMN cyst" vs "IPMN" p < 0.05 (two-tailed)

† indicates "non-IPMN cyst" vs "Cancer" p < 0.05 (two-tailed)

n.a. = not applicable

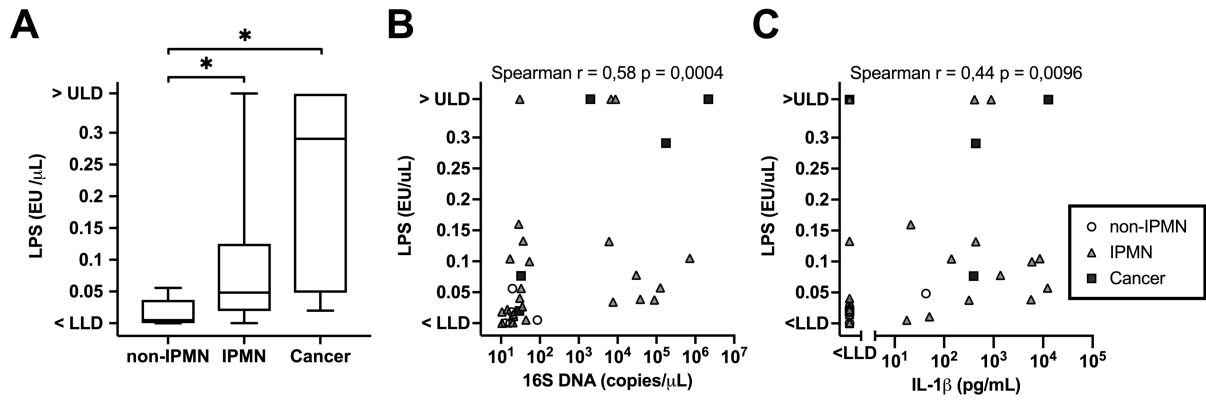

**Supplemental Figure 1. A)** Quantification of bacterial lipopolysaccharide (LPS) in cyst fluid from "non-IPMN" (n=5), "IPMN" (n=24), "IPMN Cancer" (n=5) patients. **B)** Spearman correlation analysis on intracystic 16S DNA copies and LPS quantities. **C)** Spearman correlation analysis on intracystic IL-1 $\beta$  and LPS quantities. Statistically significant differences were determined using Kruskal-Wallis test with Dunn's multiple comparison test with \*  $p < 0.05$ . LLD = lower limit of detection, ULD = upper limit of detection.

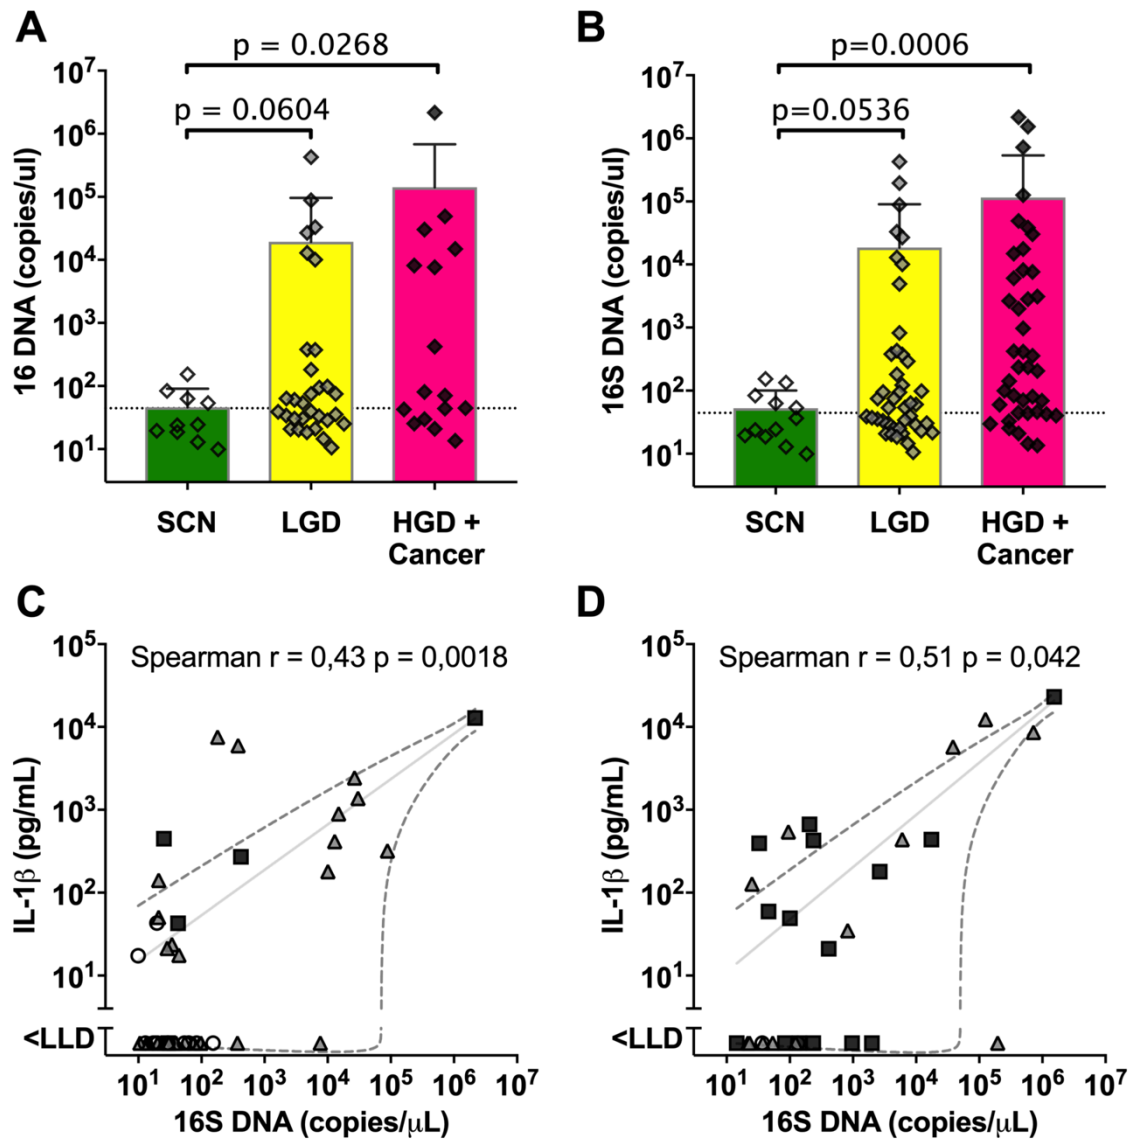

**Supplemental Figure 2.** Intracystic quantity of bacterial 16S DNA in **A**) patients who never underwent IEP in “SCN” (n=10), “IPMN LGD” (n=31), “IPMN HGD and Cancer” (n=16) patient group, and **B**) in all patients of “SCN” (n=12), “IPMN LGD” (n=43), “IPMN HGD and Cancer” (n=41) patient group. Bars indicate mean for 16S DNA quantity. Spearman correlation analysis on 16S DNA and IL-1 $\beta$  quantities in cyst fluid in **C**) patients who never underwent IEP, and **D**) patients that had history or prior IEP. Statistically significant differences were determined using Mann-Whitney test.

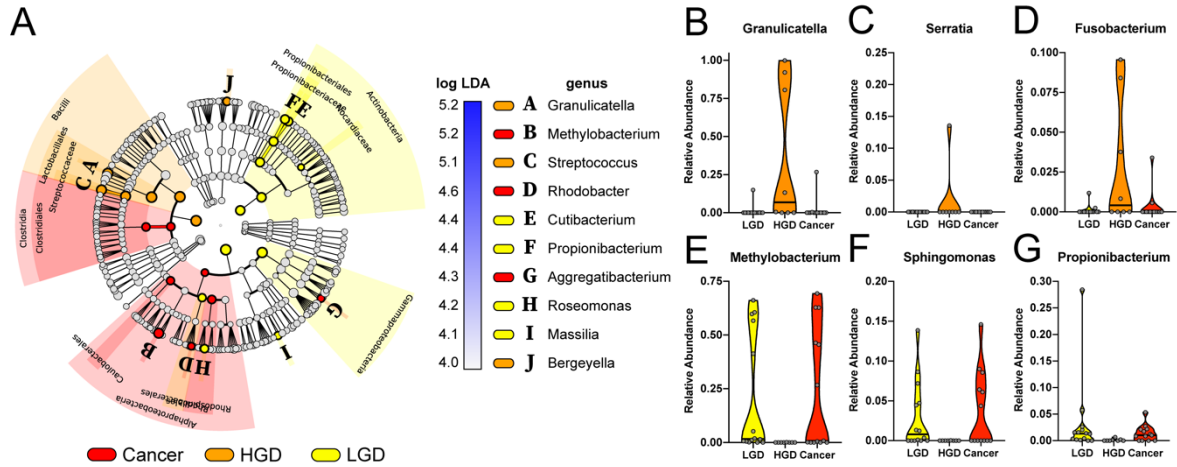

**Supplemental Figure 3.** Sub-analysis of microbial relative abundance data allowing one sample per patient (n=35) **A**) Cladogram representing LEfSe results which identified 10 features that are differentially abundant between the three diagnose classes (red = Cancer, orange = IPMN HGD, yellow = IPMN LGD). **B,C,D,E,F,G**) Violin plot showing relative abundance distribution and median of selected differentially abundant bacterial genera per diagnose group.
